# Supplementary material for: Acid–base controllable nanostructures and the fluorescence detection of H2PO4− by the molecular shuttling of tetraphenylethene-based [2]rotaxanes
Source: Royal Society of Chemistry journal article supplement (doi:10.1039/d0tc05358a), 2021-01-01
Supplement: d0tc05358a1.pdf [file d0tc05358a1.pdf]

## Supporting Information

### **Acid-base controllable nanostructures and fluorescence detection of $\text{H}_2\text{PO}_4^-$ by molecular shuttling of tetraphenylethene-based [2]rotaxanes**

*Reguram Arumugaperumal,<sup>a</sup> Muthaiah Shellaiah,<sup>b</sup> Yu-Kuang Lai,<sup>a</sup> Parthiban Venkatesan,<sup>b</sup> Putikam Raghunath,<sup>c</sup> Shu-Pao Wu,<sup>b</sup> Ming-Chang Lin,<sup>c</sup> Kien Wen Sun,<sup>b</sup> Wen-Sheng Chung<sup>b</sup> and Hong-Cheu Lin<sup>a,d\*</sup>*

<sup>a</sup>Department of Materials Science and Engineering, National Chiao Tung University, Hsinchu 300, Taiwan. R.O.C

<sup>b</sup>Department of Applied Chemistry, National Chiao Tung University, Hsinchu 300, Taiwan. R.O.C

<sup>c</sup>Center for Interdisciplinary Molecular Science, Department of Applied Chemistry, National Chiao Tung University, Hsinchu 300, Taiwan. R.O.C

<sup>d</sup>Center for Emergent Functional Matter Science, National Chiao Tung University, Hsinchu 300, Taiwan. R.O.C

**\*Author for Correspondence:**

Prof. Hong-Cheu Lin

Department of Materials Science and Engineering

National Chiao Tung University

Hsinchu, Taiwan (ROC)

Tel: 8863-5712121ext.55305

Fax: 8863-5724727

E-mail: [linhc@mail.nctu.edu.tw](mailto:linhc@mail.nctu.edu.tw)

**Contents:**

|                                                         |                |
|---------------------------------------------------------|----------------|
| Synthesis overview, procedure and characterization..... | <b>S3-S8</b>   |
| Supporting figures and table .....                      | <b>S8-S20</b>  |
| NMR, mass spectra data and IR spectra .....             | <b>S20-S30</b> |
| References .....                                        | <b>S31</b>     |

## Synthesis overview

The following compounds were synthesized according to the reported procedures: 4-(1,2,2-triphenylvinyl)phenol **S1**<sup>S1</sup> and compound **DBA**.<sup>S2</sup>

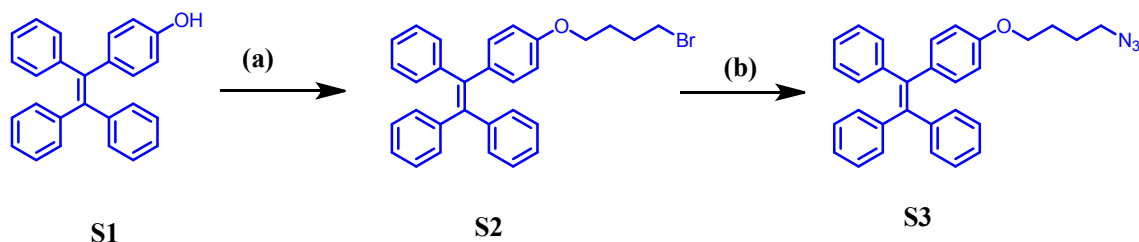

**Scheme S1.** Synthesis of stopper **S3**. Reagents and conditions: (a) 1,4 dibromobutane,  $K_2CO_3$ , acetone, reflux, 24 h, 79 % (b)  $NaN_3$ , DMF, 80 °C, 12 h, 94%;

## Synthetic procedure and characterization

### Compound **S2**

A mixture of **S1** (2.3 g, 6.6 mmol) and  $K_2CO_3$  (4.6 g, 33.3 mmol) in acetone (300 mL) was refluxed under  $N_2$  atmosphere for 1 h, then 1,4-dibromobutane (2 mL, 16.7 mmol) was added into reaction mixture and stirred 24 h. After filtration, the solution was concentrated under reduced pressure. The crude product was purified by column chromatography over silica gel (eluent: 1 to 2 % EtOAc in hexane, increase in increments of 0.5 % after 1000 mL of eluent) to afford **S2** as a pale yellow oil (2.5 g, 79 %).  $^1H$  NMR (300 MHz,  $CDCl_3$ ):  $\delta$  = 7.13–6.99 (m, 15H), 6.92 (dd,  $J$  = 2.1 Hz, 6.9 Hz, 2H), 6.62 (dd,  $J$  = 2.1 Hz, 6.6 Hz, 2H), 3.92 (t,  $J$  = 6.0 Hz, 2H), 3.47 (t,  $J$  = 6.3 Hz, 2H), 2.09–2.00 (m, 2H), 1.95–1.85 (m, 2H).  $^{13}C$  NMR (75 MHz,  $CDCl_3$ ):  $\delta$  = 157.70, 144.36, 144.30, 140.82, 140.43, 136.52, 132.88, 131.68, 128.05, 127.93, 126.69, 126.57, 113.87, 66.93, 33.84, 29.82, 28.24.

### Compound **S3**

A mixture of **S2** (2.2 g, 4.5 mmol) and  $NaN_3$  (1.48 g, 22.8 mmol) in DMF (15 mL) was stirred at 80 °C for 12 h. After cooling to the room temperature, the reaction mixture was filtered and then concentrated under reduced pressure. The crude product was purified by column chromatography over silica gel (eluent: 3 % EtOAc in hexane) to afford **S3** as a pale yellow

oil (1.9 g, 94 %).  $^1\text{H NMR}$  (300 MHz,  $\text{CDCl}_3$ ):  $\delta$  = 7.13–6.99 (m, 15H), 6.93 (dd,  $J$  = 1.8 Hz, 6.9 Hz, 2H), 6.62 (dd,  $J$  = 2.1 Hz, 8.7 Hz, 2H), 3.91 (t,  $J$  = 5.7 Hz, 2H), 3.35 (t,  $J$  = 6.6 Hz, 2H), 1.85–1.75 (m, 4H).  $^{13}\text{C NMR}$  (75 MHz,  $\text{CDCl}_3$ ):  $\delta$  = 157.70, 144.35, 144.29, 140.82, 140.42, 136.50, 132.87, 131.67, 128.04, 127.92, 126.67, 126.56, 113.86, 67.27, 51.51, 26.83, 26.08. **HRMS (ESI<sup>+</sup>)**:  $m/z$  = 445.2140 [ $\text{M}$ ]<sup>+</sup> (calcd. 445.2154 for  $\text{C}_{30}\text{H}_{27}\text{N}_3\text{O}$ ).

### Synthesis of thread A1

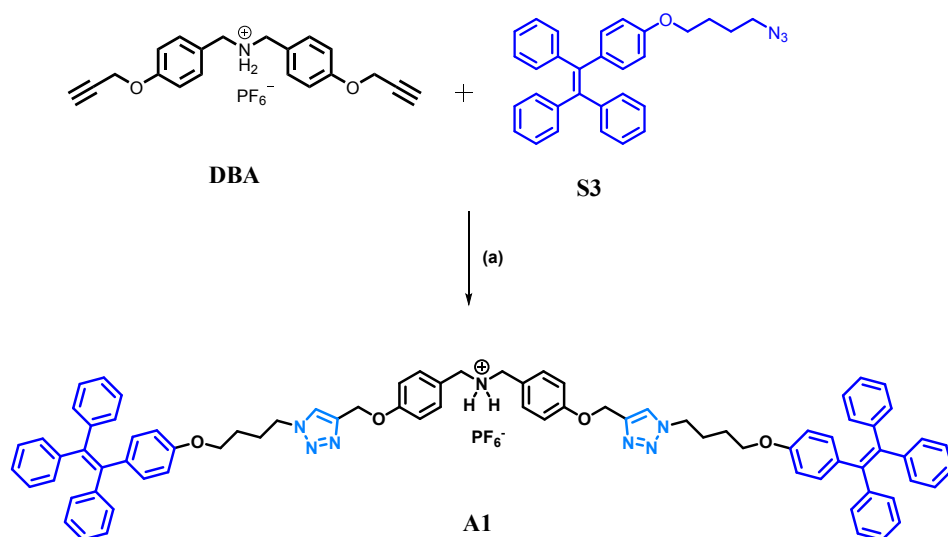

**Scheme S2.** Synthesis of thread **A1**. Reagents and conditions: (a)  $\text{CuSO}_4 \cdot 5\text{H}_2\text{O}$ , Sodium Ascorbate, THF/water (3:1 ratio), room temp, overnight, 78 %.

### Synthetic procedure and characterization

#### Thread A1

Compound **DBA** (0.3 g, 0.66 mmol) and **S3** (0.293 g, 0.66 mmol) were dissolved in THF/ $\text{H}_2\text{O}$  (v/v = 3:1, 40 mL) in a round-bottomed flask under an inert atmosphere. An aqueous solution of copper (II) sulphate pentahydrate (0.328 g, 1.32 mmol) and sodium ascorbate (0.522 g, 2.64 mmol) was added to the reaction mixture and allowed to stir at room temperature for overnight. Completion of the reaction was monitored by TLC ( $\text{SiO}_2$ ). The solvent was removed under reduce pressure and the crude product dissolved in DCM (100 mL). The organic phase was washed successively with an aqueous solution of  $\text{NH}_4\text{Cl}$  ( $2 \times 30$  mL) and  $\text{H}_2\text{O}$  (30 mL) and was separated, dried ( $\text{MgSO}_4$ ) and evaporated. The crude product was purified by silica gel chromatography (DCM / MeOH, 9.8/0.2) to afford the pure compound **A1** as a pale white solid

in 78 % yield.  $^1\text{H NMR}$  (400 MHz,  $\text{CD}_3\text{CN}$ ):  $\delta_{\text{H}}$  7.83 (s, 2H), 7.27 (d,  $J = 8.08$  Hz, 4H), 7.13–7.11 (m, 14H) 7.05–7.03 (m, 15H), 6.97 (d,  $J = 8.52$ , 4H) 6.92 (d,  $J = 8.84$ , 4H) 6.65–6.63 (m, 4H), 5.14 (s, 4H), 4.43–4.39 (m, 4H), 3.90–3.87 (m, 4H). 3.70 (s, 4H), 2.03–1.96 (m, 4H), 1.72–1.65 (m, 4H) ppm;  $^{13}\text{C NMR}$  (100 MHz,  $\text{CD}_3\text{CN}$ )  $\delta$  (ppm) = 157.51, 144.01, 143.95, 140.68, 140.29, 135.98, 132.13, 130.93, 130.89, 130.86, 127.75, 127.67, 126.40, 126.34, 126.30, 123.67, 113.38, 66.92, 61.54, 49.63, 26.71, 25.87. **HRMS–ESI** ( $m/z$ ):  $[\text{M–PF}_6^-]^+$  calcd for  $\text{C}_{80}\text{H}_{74}\text{N}_7\text{O}_4^+$ , 1196.5797; found, 1196.5803.

### Synthesis of [2]rotaxane TR1 and TR2

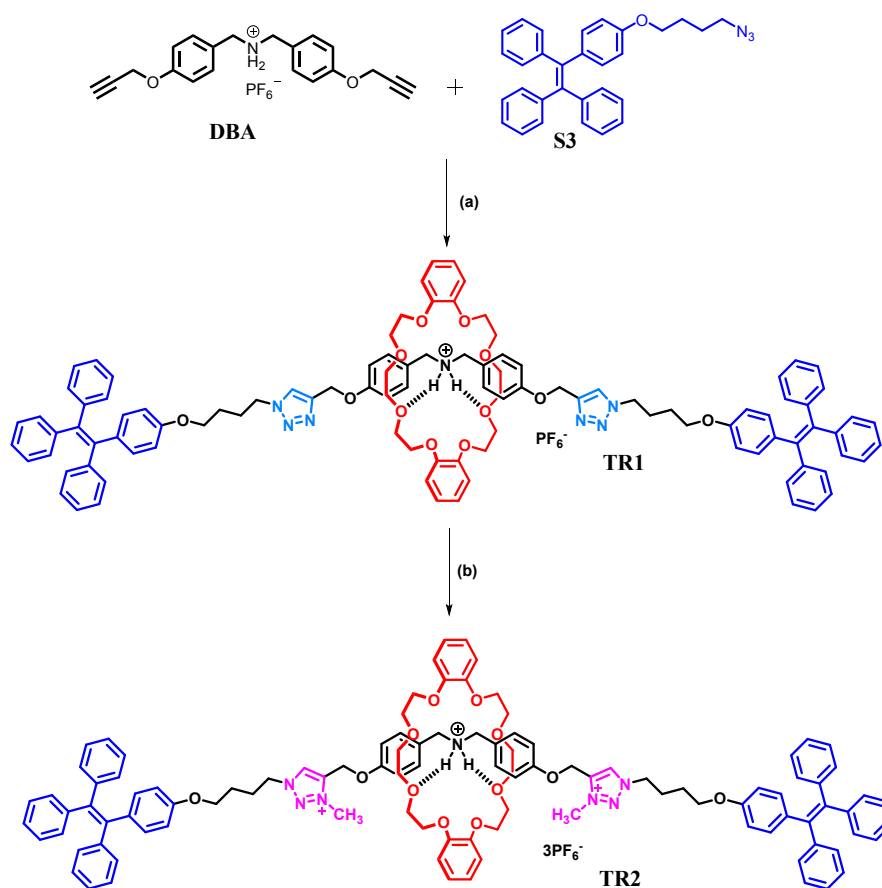

**Scheme S3.** Synthesis of [2]rotaxane **TR1** and **TR2**. Reagents and condition s: (a)  $\text{Cu}(\text{CH}_3\text{CN})_4\text{PF}_6$ , 2,6-lutidine, dry DCM, under  $\text{N}_2$  atmosphere, room temperature, 24 h, 75%; (b)  $\text{CH}_3\text{I}$ ,  $\text{CH}_3\text{CN}$ ,  $\text{NH}_4\text{PF}_6$ , 40 °C, 4 d, 84%.

## Synthetic procedure and characterization

### [2]Rotaxane TR1

To a solution of **DBA** (500 mg, 1.11 mmol), **DB24C8** (646 mg, 1.44 mmol) in degassed DCM (50 mL) was stirred at room temperature for 2 h under N<sub>2</sub> atmosphere. Then, a solution of **S3** (988 mg, 2.22 mmol) in DCM (10 mL), Cu(CH<sub>3</sub>CN)<sub>4</sub>PF<sub>6</sub> (1.65 g, 4.43 mmol) and 2,6-lutidine (40 μL, 0.35 mmol) were added. The reaction mixture was stirred for 24 h at room temperature. The resulting mixture was dissolved by DCM and then washed with brine three times. Then the organic phase was dried over anhydrous magnesium sulfate, and concentrated which was purified by column chromatography over silica gel (eluent: 0 to 2 % MeOH in DCM, increase in increments of 0.5 % after 750 mL of eluent) to afford [2]rotaxane **TR1** as a pale white solid (1.5 g, 75 %). <sup>1</sup>H NMR (400 MHz, ACN-*d*<sub>3</sub>): δ<sub>H</sub> 7.81 (s, 2H), 7.41 (br, 2H), 7.28 (d, *J* = 8.72 Hz, 4H), 7.15–7.11 (m, 18H), 7.06–7.01 (m, 12H), 6.93 (d, *J* = 8.8 Hz, 4H), 6.89–6.86 (m, 4H), 6.83–6.78 (m, 8H), 6.65 (d, *J* = 8.84 Hz, 4H), 5.04 (s, 4H), 4.59 (t, *J* = 6.64 Hz, 4H), 4.42 (t, *J* = 7.04 Hz, 4H), 4.29–4.27 (m, 4H), 4.07–4.05 (m, 4H), 3.90 (t, *J* = 6.24 Hz, 4H), 3.78–3.75 (m, 8H), 3.63 (s, 4H), 3.58 (s, 4.26), 2.03–1.95 (m, 4H), 1.73–1.66 (m, 4H) ppm; <sup>13</sup>C NMR (75 MHz, ACN-*d*<sub>3</sub>): δ = 159.7, 158.5, 149.4, 148.4, 145.0, 144.9, 141.6, 141.3, 137.0, 133.1, 131.8, 128.7, 128.6, 127.4, 127.3, 125.5, 123.6, 122.2, 116.8, 115.6, 114.5, 113.4, 71.5, 71.1, 69.4, 68.8, 67.9, 62.3, 52.7, 50.6, 27.7, 26.9. HRMS (ESI<sup>+</sup>): *m/z* = 1644.7784 [M–PF<sub>6</sub>]<sup>+</sup> (calcd. 1644.7899 for C<sub>104</sub>H<sub>106</sub>N<sub>7</sub>O<sub>12</sub>).

### [2]Rotaxane TR2

To a solution of [2]rotaxane **TR1** (1 g, 0.56 mmol) in MeCN (15 mL), CH<sub>3</sub>I (15 mL) was added to the reaction mixture. The reaction mixture was heated at 40 °C for 4 days. Then, the solvent was removed under reduced pressure and the crude product was dissolved in acetone (15 mL) and DCM (15 mL), a saturated aqueous solution of NH<sub>4</sub>PF<sub>6</sub> was added and the mixture was stirred for 24 hours at room temperature. The resulting mixture was dissolved by DCM and then washed with brine three times. Then the organic phase was dried over anhydrous magnesium sulfate, and concentrated which was purified by column chromatography over silica gel (eluent: 0 to 2 % MeOH in DCM, increase in increments of 0.5 % after 750 mL of eluent) to afford [2]rotaxane **TR2** as a pale brown solid (1 g, 84 %). <sup>1</sup>H NMR (400 MHz, ACN-*d*<sub>3</sub>): δ<sub>H</sub> = 8.43 (s, 2H), 7.50 (br, 2H), 7.36 (d, *J* = 8.72 Hz, 4H), 7.16–7.10 (m, 18H), 7.08–7.01 (m, 12H), 6.95 (d,

$J = 8.8$  Hz, 4H), 6.87 (m, 12H), 6.69 (d,  $J = 8.8$  Hz, 4H), 5.15 (s, 4H), 4.66 (m, 8H), 4.22 (s, 6H), 4.07 (m, 4H), 3.95 (t,  $J = 6.12$  Hz, 4H), 3.82–3.79 (m, 10H), 3.67 (s, 4H), 3.66 (s, 4H), 2.15–2.13 (m, 4H), 1.83–1.79 (m, 4H) ppm;  $^{13}\text{C}$  NMR (75 MHz,  $\text{ACN-}d_3$ ):  $\delta = 158.5, 158.4, 149.7, 148.4, 145.1, 145.0, 144.9, 141.6, 141.5, 140.5, 137.2, 133.2, 132.2, 131.9, 130.4, 128.8, 128.7, 127.5, 127.4, 126.9, 122.7, 122.2, 115.6, 115.4, 114.6, 113.4, 71.6, 71.8, 70.2, 69.5, 68.8, 67.7, 59.0, 54.7, 52.6, 39.4, 26.9$ . HRMS (ESI<sup>+</sup>):  $m/z = 1819.7760$  [ $\text{M}-2\text{PF}_6$ ]<sup>+</sup> (calcd. 1819.8011 for  $\text{C}_{106}\text{H}_{112}\text{F}_6\text{N}_7\text{O}_{12}\text{P}$ ).

### Synthesis of [2]rotaxane TR3

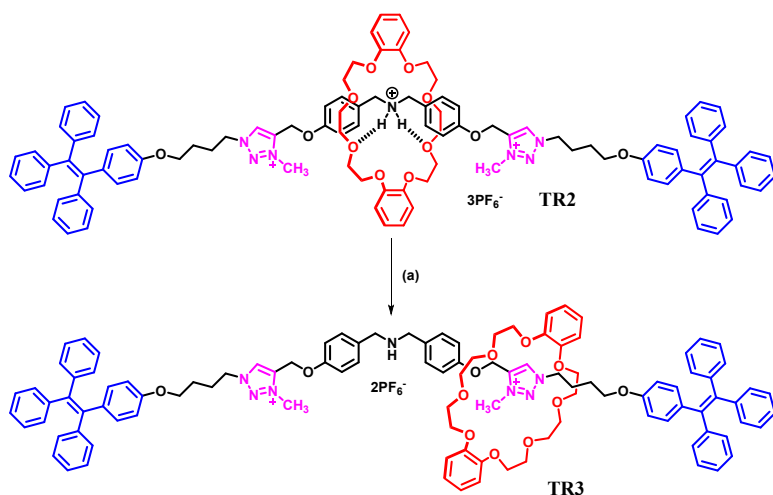

**Scheme S4.** Synthesis of [2]rotaxane **TR3** with reagents and conditions: (a) DCM, aq. NaOH (0.1M), 2 h, 95%.

### Synthetic procedure and characterization

#### [2]Rotaxane TR3

[2]Rotaxane **TR2** (50 mg, 23.69  $\mu\text{mol}$ ) was dissolved in dichloromethane (5 mL). NaOH (aq) 1 M (2 mL) was added and the mixture was stirred vigorously at room temperature for 2 h. The layers were separated, the organic phase dried over  $\text{MgSO}_4$ , filtered off and concentrated affording the rotaxane [2]rotaxane **TR3** (40 mg, 95%) as a pale brown solid.  $^1\text{H}$  NMR (300 MHz,  $\text{ACN-}d_3$ ):  $\delta = 9.07$  (s, 1H), 8.44 (s, 1H), 7.32 (d,  $J = 8.4$  Hz, 4H), 7.14–7.09 (m, 18H), 7.05–6.99 (m, 12H), 6.86 (d,  $J = 8.4$  Hz, 6H), 6.83–6.63 (m, 10H), 6.56 (br, 4H), 5.01 (br, 2H), 4.96 (br, 2H), 4.90 (br, 4H), 4.19 (t,  $J = 4.5$  Hz, 4H), 3.97 (s, 6H), 3.76 (t,  $J = 4.5$  Hz, 6H), 3.69 (s, 12H), 3.64 (s, 4H), 3.53 (br, 6H), 2.20 (br, 4H), 1.77–1.73 (m, 4H).  $^{13}\text{C}$  NMR (75

MHz, ACN- $d_3$ ):  $\delta$  = 157.4, 156.0, 148.5, 147.6, 144.0, 143.9, 140.6, 140.3, 136.0, 134.9, 132.1, 130.8, 130.0, 129.4, 127.7, 127.6, 126.4, 124.1, 122.3, 121.3, 120.8, 118.7, 115.4, 114.6, 113.5, 70.7, 69.7, 68.9, 68.6, 68.3, 67.9, 58.1, 53.5, 51.9, 31.3, 29.5, 25.5, 22.3, 13.3. **HRMS (ESI<sup>+</sup>)**:  $m/z$  = 1964.7647 [M+H]<sup>+</sup> (calcd. 1964.7653 for C<sub>106</sub>H<sub>112</sub>F<sub>12</sub>N<sub>7</sub>O<sub>12</sub>P<sub>2</sub>).

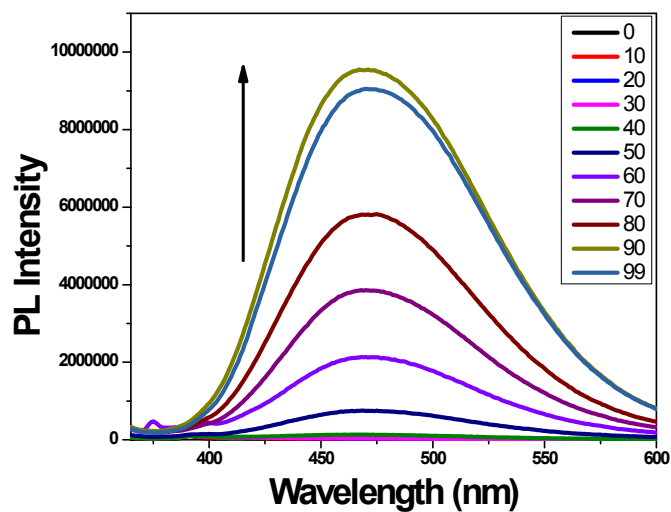

**Fig. S1** Fluorescence spectra of thread **A1** (10 μM) with different water fractions ( $\lambda_{\text{ex}} = 325$  nm) in CH<sub>3</sub>CN/water solutions.



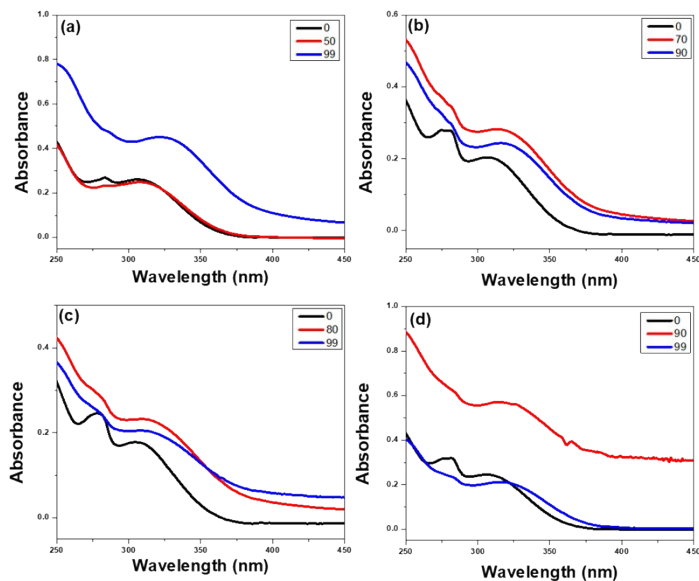

**Fig. S2** UV-vis absorption spectra (10 $\mu$ M) with different water fractions in CH<sub>3</sub>CN/water solutions; (a) thread **A1** (b) [2]rotaxane **TR1** (c) [2]rotaxane **TR2** and (d) [2]rotaxane **TR3**.

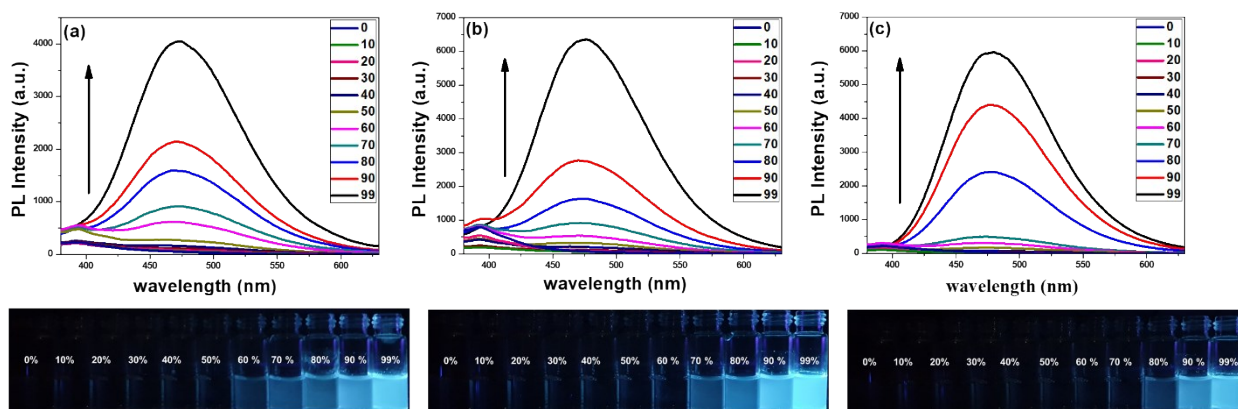

**Fig. S3** Fluorescence emission spectra and photographs of [2]rotaxanes (a) **TR1**, (b) **TR2** and (c) **TR3** (10  $\mu$ M) in DMSO/glycerol solutions with different glycerol fractions ( $\lambda_{\text{ex}} = 325$  nm). Insets: Photo images of fluorescence emissions (excited by UV lamp at 365 nm).

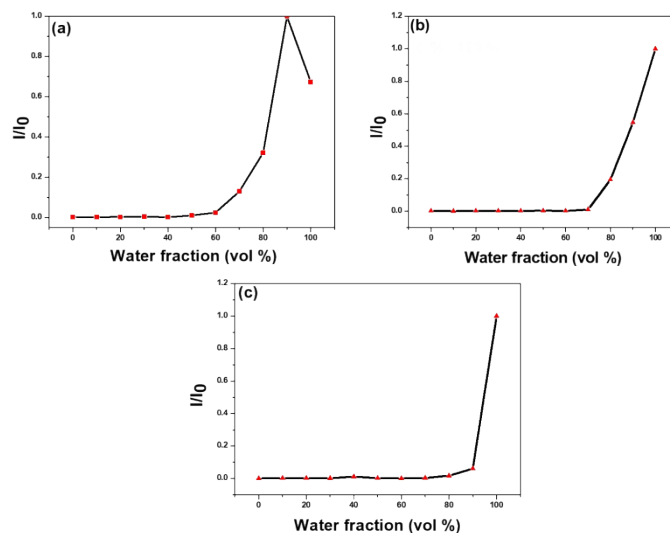

**Fig. S4** PL Plots of  $I/I_0$  versus water fractions ( $f_w$ ) of [2]rotaxanes (a) **TR1**, (b) **TR2** and (c) **TR3**. Where  $I_0$  = emission intensity in pure  $\text{CH}_3\text{CN}$  solution ( $10\mu\text{M}$ ).

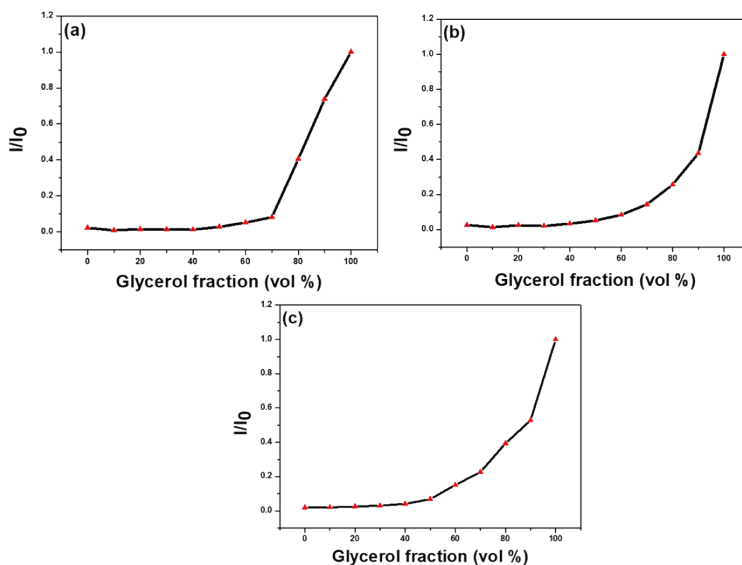

**Fig. S5** PL Plots of  $I/I_0$  versus glycerol fractions ( $f_w$ ) of [2]rotaxanes (a) **TR1**, (b) **TR2** and (c) **TR3**. Where  $I_0$  = emission intensity in pure  $\text{DMSO}$  solution ( $10\mu\text{M}$ ).

**Table S1.** Time-resolved fluorescence decay constants of [2]rotaxanes **TR1**, **TR2** and **TR3** in pure CH<sub>3</sub>CN solvent and at 90% of water fraction ( $f_w$ ) in the CH<sub>3</sub>CN/water solutions.

| Compounds           | $\tau_1$ (ns) | $\tau_2$ (ns) | $A_1$ (%) | $A_2$ (%) | $\tau_{\text{Avg}}$ (ns) |
|---------------------|---------------|---------------|-----------|-----------|--------------------------|
| <b>TR1</b><br>(0%)  | 4.378         | 1.0300        | 57.1      | 49.29     | 1.13                     |
| <b>TR1</b><br>(90%) | 1.134         | 0.6907        | 77.38     | 22.62     | 2.72                     |
| <b>TR2</b><br>(0%)  | 4.964         | 1.4243        | 45.74     | 54.26     | 1.64                     |
| <b>TR2</b><br>(90%) | 0.683         | 2.5903        | 49.82     | 50.18     | 3.04                     |
| <b>TR3</b><br>(0%)  | 1.370         | 5.502         | 41.40     | 58.60     | 3.79                     |
| <b>TR3</b><br>(90%) | 2.712         | 0.7349        | 56.75     | 43.25     | 3.79                     |

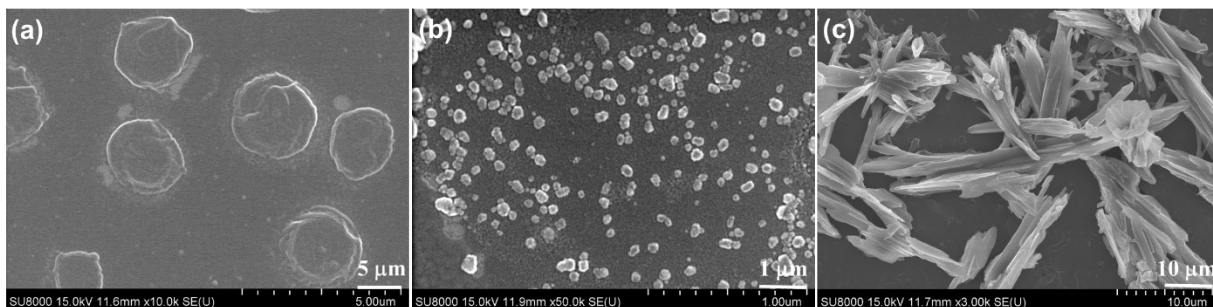

**Fig. S6** FE-SEM images of thread **A1** (1.0  $\mu\text{M}$ ): (a) in CH<sub>3</sub>CN only, (b) CH<sub>3</sub>CN/water ( $f_w = 50\%$ ) (c) CH<sub>3</sub>CN/water ( $f_w = 90\%$ ). Scale bar was a = 5  $\mu\text{m}$ , b = 1  $\mu\text{m}$  and c = 10  $\mu\text{m}$ .

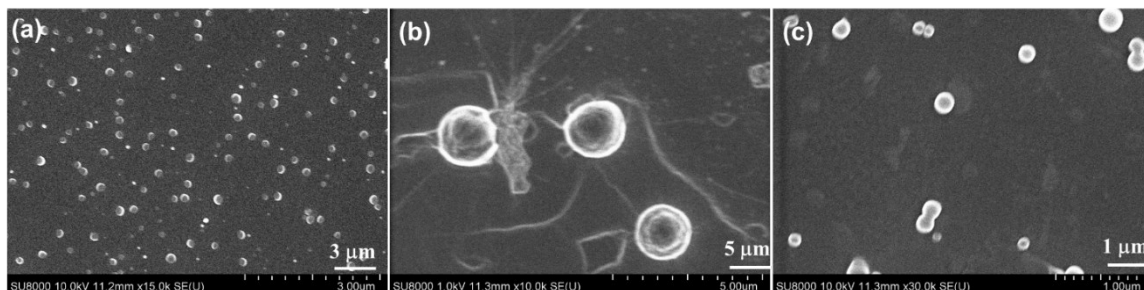

**Fig. S7** FE-SEM images of [2]rotaxanes in  $\text{CH}_3\text{CN}$  ( $1.0 \mu\text{M}$ ) (a) **TR1**, (b) **TR2** and (c) **TR3**. Scale bar was  $a = 3 \mu\text{m}$ ,  $b = 5 \mu\text{m}$  and  $c = 1 \mu\text{m}$ .

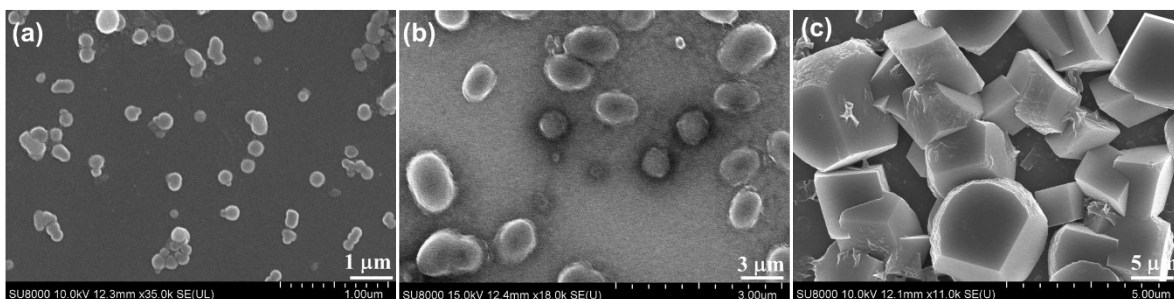

**Fig. S8** FE-SEM images of [2]rotaxanes in  $\text{CH}_3\text{CN}/\text{water}$  solutions ( $1.0 \mu\text{M}$ ): (a)  $70\% f_w$  of **TR1**, (b)  $80\% f_w$  of **TR2**, (c)  $90\% f_w$  of **TR3**. Scale bar is  $1 \mu\text{m}$  for Figs a while it is  $3 \mu\text{m}$  and  $5 \mu\text{m}$  in Figs b and c, respectively.

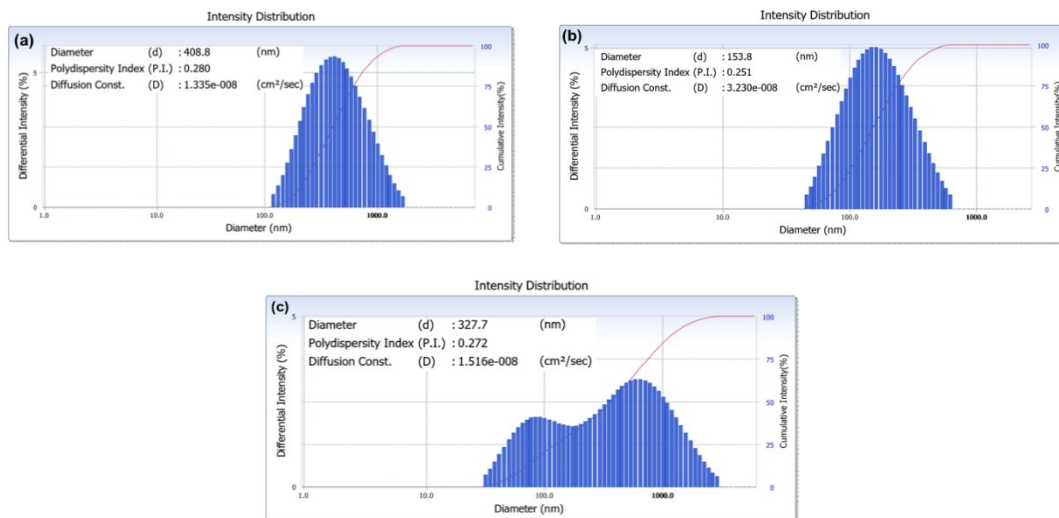

**Fig. S9** The size distributions of [2]rotaxanes (a) **TR1** at 90 %  $f_w$ , (b) **TR2** at 99 %  $f_w$  and (c) **TR3** at 99 %  $f_w$  in  $\text{CH}_3\text{CN}/\text{water}$  solutions ( $1.0 \mu\text{M}$ ).

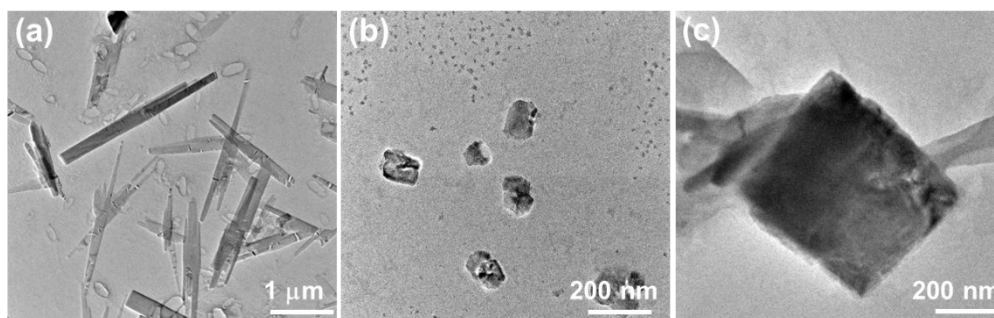

**Fig. S10** TEM images of [2]rotaxanes in  $\text{CH}_3\text{CN}/\text{water}$  solutions ( $1.0 \mu\text{M}$ ): (a) 90%  $f_w$  of **TR1**, (nanorods) (b) 90%  $f_w$  of **TR3**, (truncated cubes) and (c) 99%  $f_w$  of **TR3** (nanocube) . Scale bar is  $1 \mu\text{m}$  for Figs a =  $\mu\text{m}$ , b and c = 200 nm.

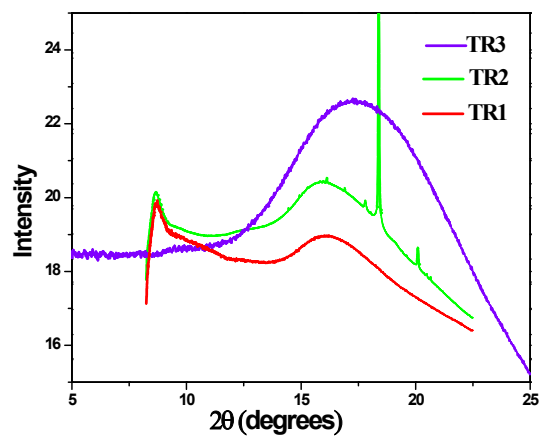

**Fig. S11** Powder XRD patterns of [2]rotaxanes **TR1**, **TR2** and **TR3**.

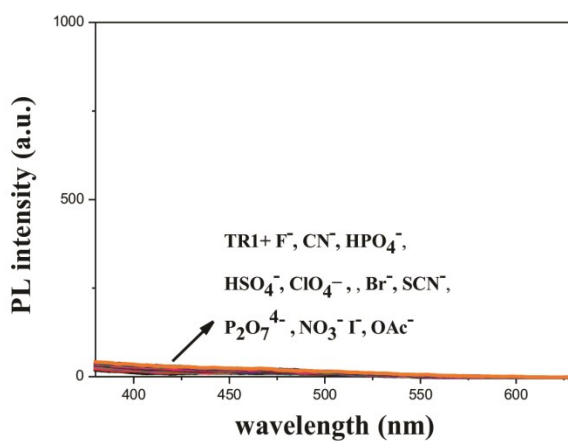

**Fig. S12** Fluorescence spectra of [2]rotaxane **TR1** (10  $\mu\text{M}$ ) in the presence of various TBA salts in  $\text{CH}_3\text{CN}$  solution (10  $\mu\text{M}$ ).

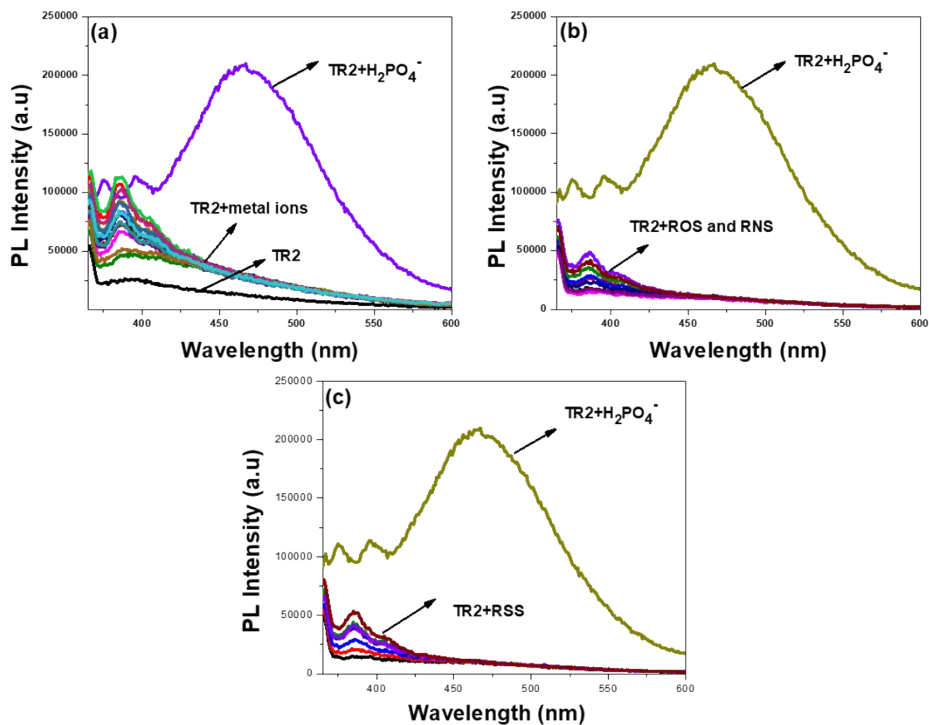

**Fig. S13** Fluorescence spectra of [2]rotaxane **TR2** (10 μM) in the presence of (a) metal ions, (b) ROS & RNS and (c) RSS in CH<sub>3</sub>CN solutions in contrast to H<sub>2</sub>PO<sub>4</sub><sup>-</sup>.

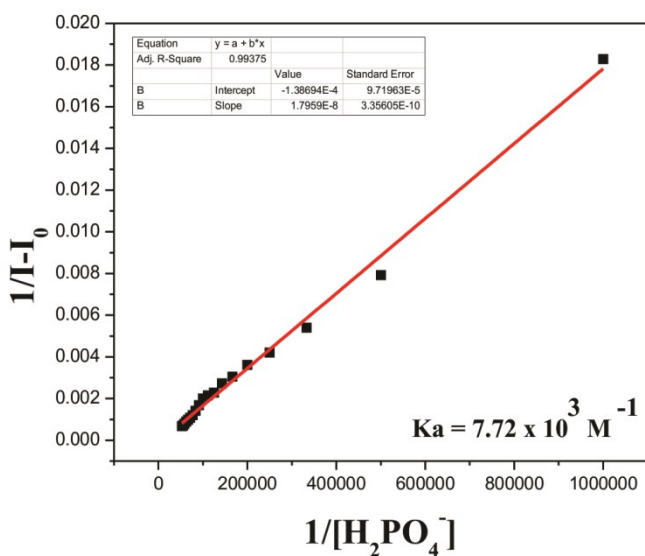

**Fig. S14** Binding constant of [2]rotaxane **TR2** for the titration of H<sub>2</sub>PO<sub>4</sub><sup>-</sup> against the ratio of fluorescence response for chemosensor in CH<sub>3</sub>CN (10 μM).

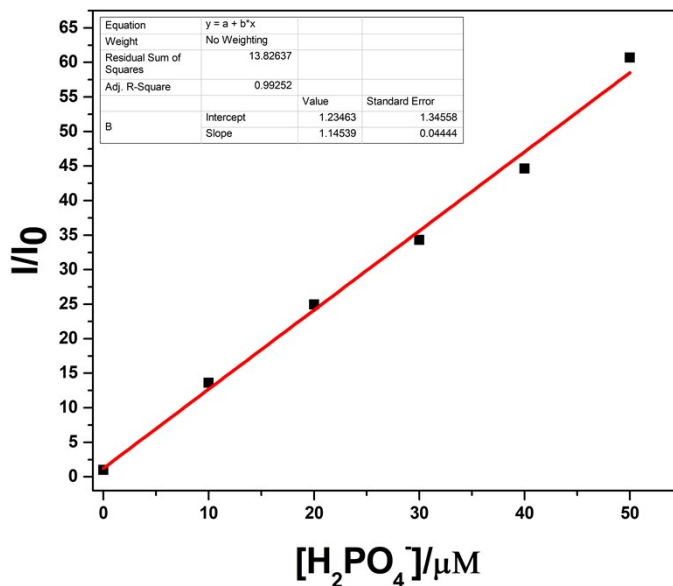

**Fig. S15** Detection limit of [2]rotaxane **TR2** in CH<sub>3</sub>CN (10 μM) upon increasing concentrations of H<sub>2</sub>PO<sub>4</sub><sup>-</sup>.

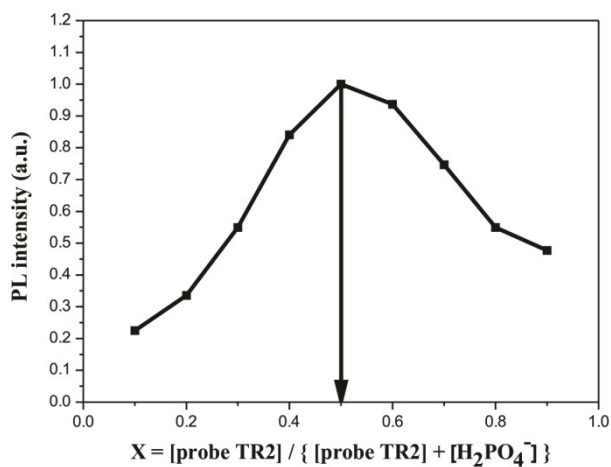

**Fig. S16** Job's plots of complexes [2]rotaxane **TR2**-H<sub>2</sub>PO<sub>4</sub><sup>-</sup> in CH<sub>3</sub>CN. The total concentration of [2]rotaxane **TR2** and H<sub>2</sub>PO<sub>4</sub><sup>-</sup> was 50.0 μM. The monitored wavelength was 480 nm.



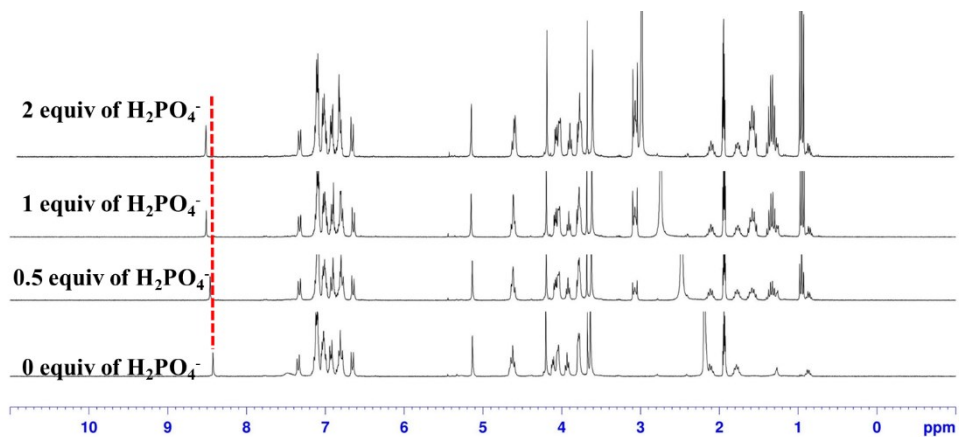

**Fig. S17**  $^1\text{H}$  NMR spectra of compound [2]rotaxane **TR2** (10 mM) in the presence of TBA- $\text{H}_2\text{PO}_4^-$  in  $\text{D}_2\text{O}/\text{CH}_3\text{CN}$ .

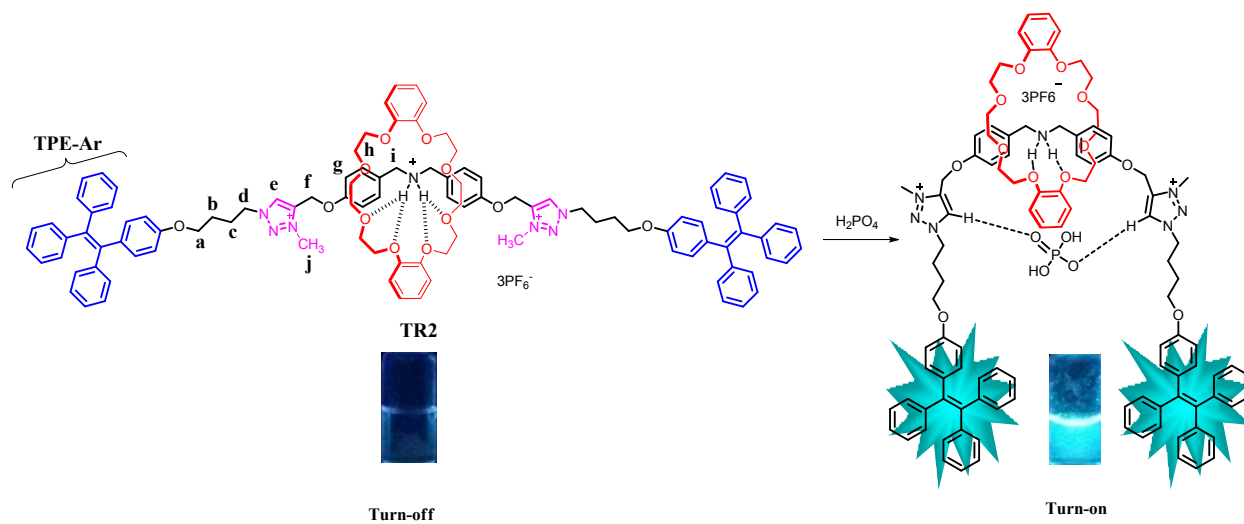

**Fig. S18** A possible proposed binding mechanisms for [2]rotaxane **TR2** towards  $\text{H}_2\text{PO}_4^-$  ion.

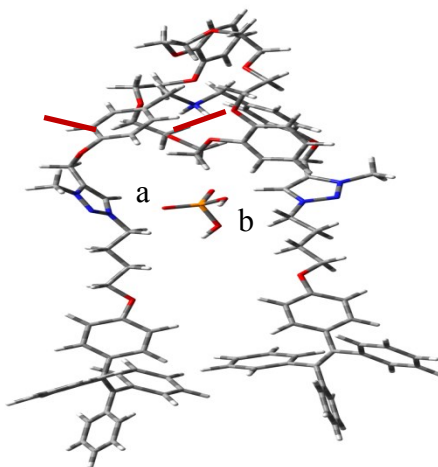

**Fig. S19** Optimized chemical structures of complexes [2]rotaxane **TR2**-H<sub>2</sub>PO<sub>4</sub><sup>-</sup> at the PM6 level. [Selected H-bond lengths (a) C-H...O: 1.978 Å; (b) C-H...O: 1.850 Å

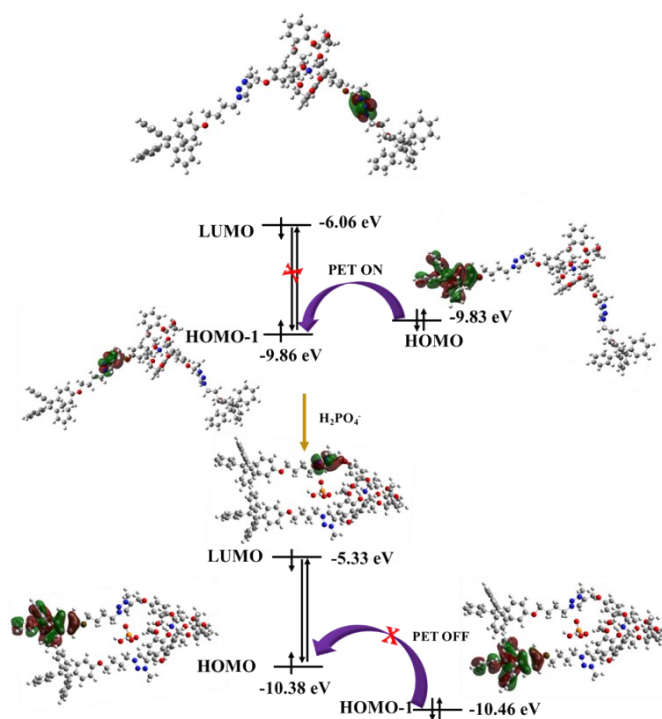

**Fig. S20** Frontier molecular orbital diagram of [2]rotaxanes **TR2** and **TR2**-H<sub>2</sub>PO<sub>4</sub><sup>-</sup> in gas phase at PM6 level.

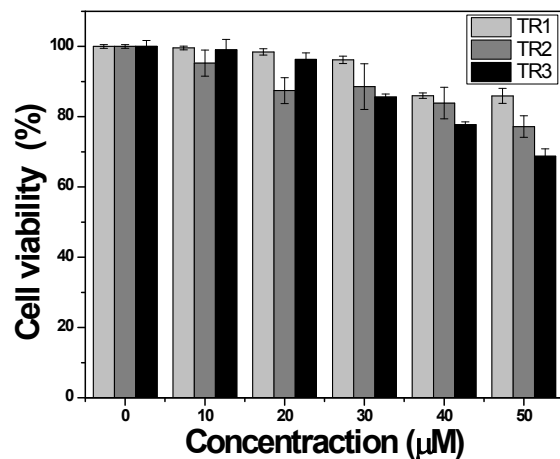

**Fig. S21** Relative cell viability values (%) of Raw 264.7 cells estimated by an MTT assay versus incubated with **TR1**, **TR2** and **TR2** at different concentrations (0–50 μM) at 37 °C for 24 h.

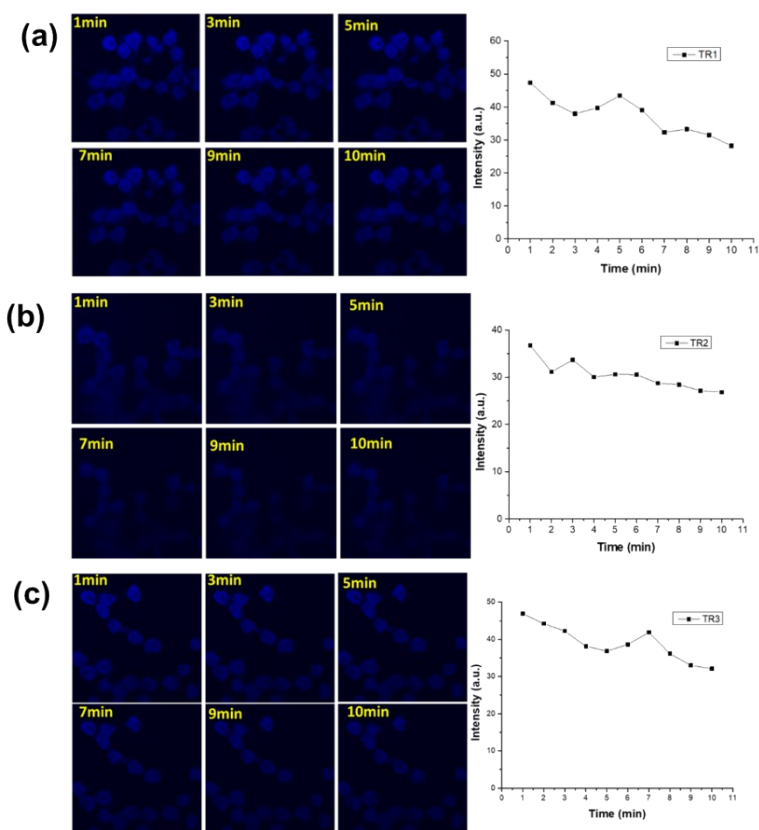

**Fig. S22** Photostability tests of [2]rotaxanes (20 μM) (a) **TR1**, (b) **TR2** and (c) **TR3** in Raw 267.7 cells acquired at different scanning time. ( $\lambda_{ex} = 380$  nm)

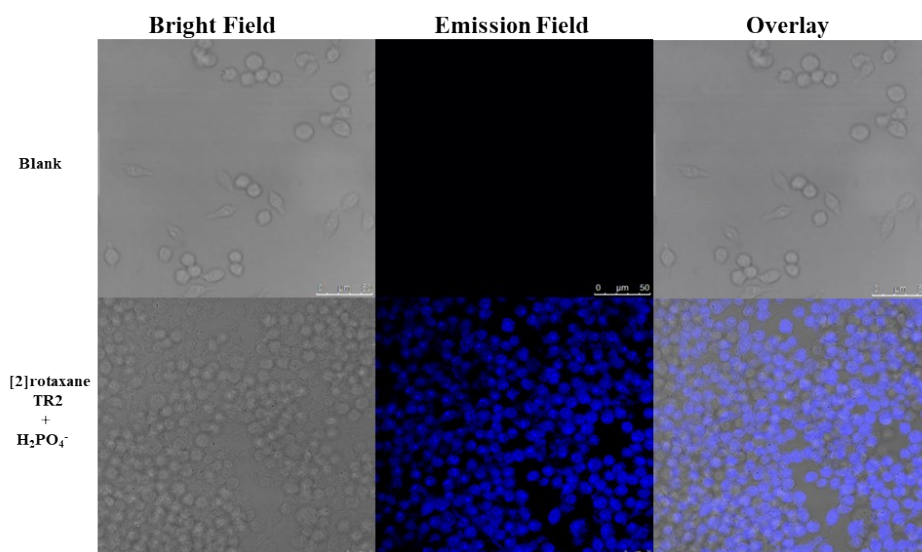

**Fig. S23** Confocal microscopic images (with an excitation wavelength of  $\lambda_{\text{ex}} = 360 \text{ nm}$ ) of (top) RAW 264.7 cells incubated with [2]rotaxane **TR2** (10  $\mu\text{M}$ ) for 30 min and (bottom) further incubated with dihydrogen phosphate  $\text{H}_2\text{PO}_4^-$  (20  $\mu\text{M}$ ) for 10 min; (left) bright-field transmission images, (center) emission-field images, and (right) overlay images.

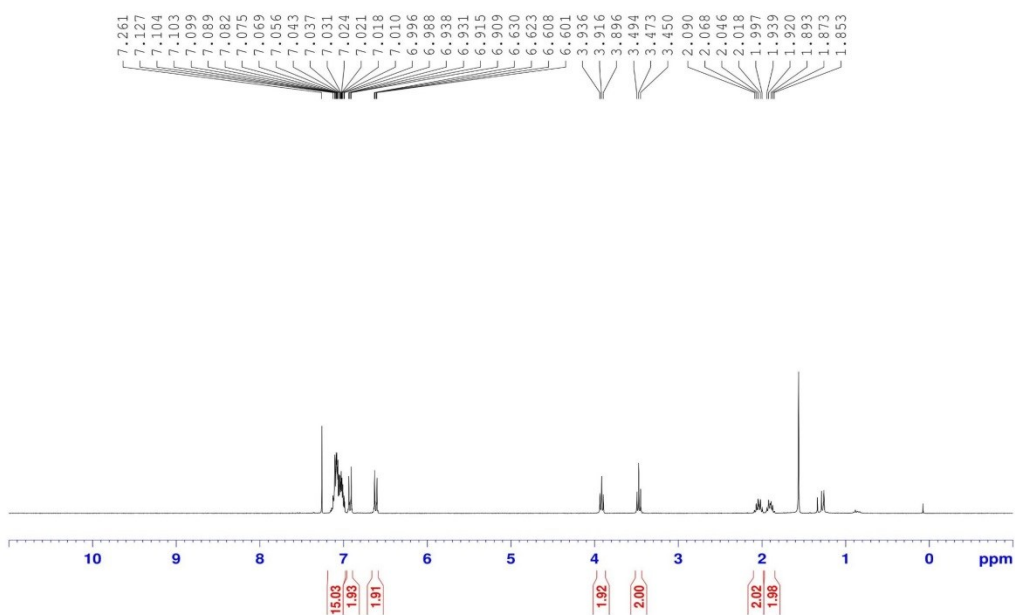

**Fig. S24** <sup>1</sup>H NMR (300 MHz, CD<sub>3</sub>Cl) spectrum of compound **S2**.

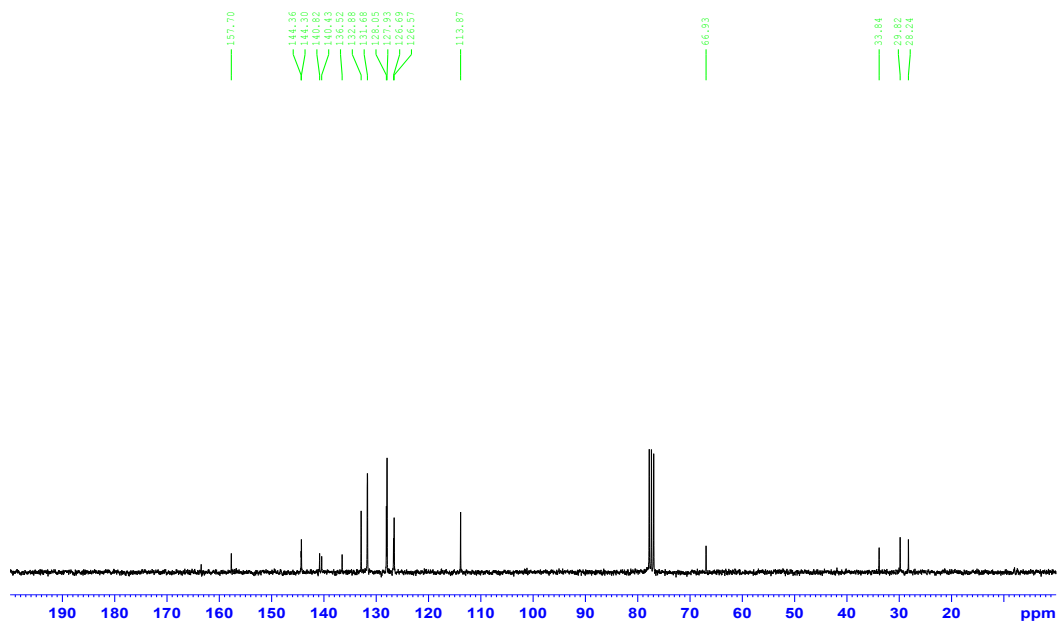

Fig. S25  $^{13}\text{C}$  NMR (75 MHz,  $\text{CD}_3\text{Cl}$ ) spectrum of compound S2.

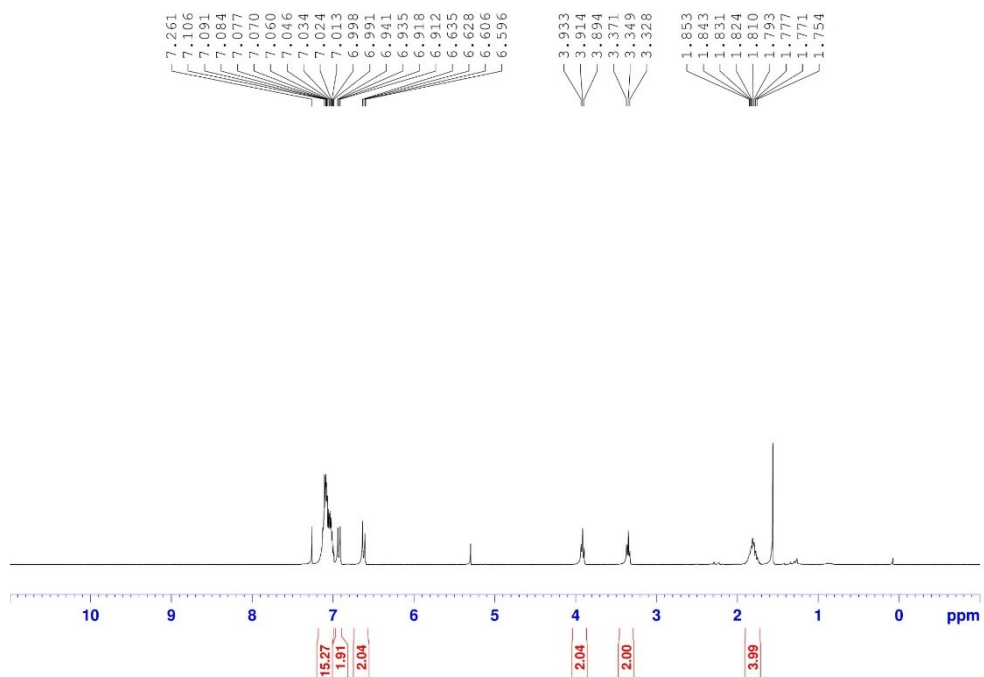

Fig. S26  $^1\text{H}$  NMR (300 MHz,  $\text{CD}_3\text{Cl}$ ) spectrum of compound S3.

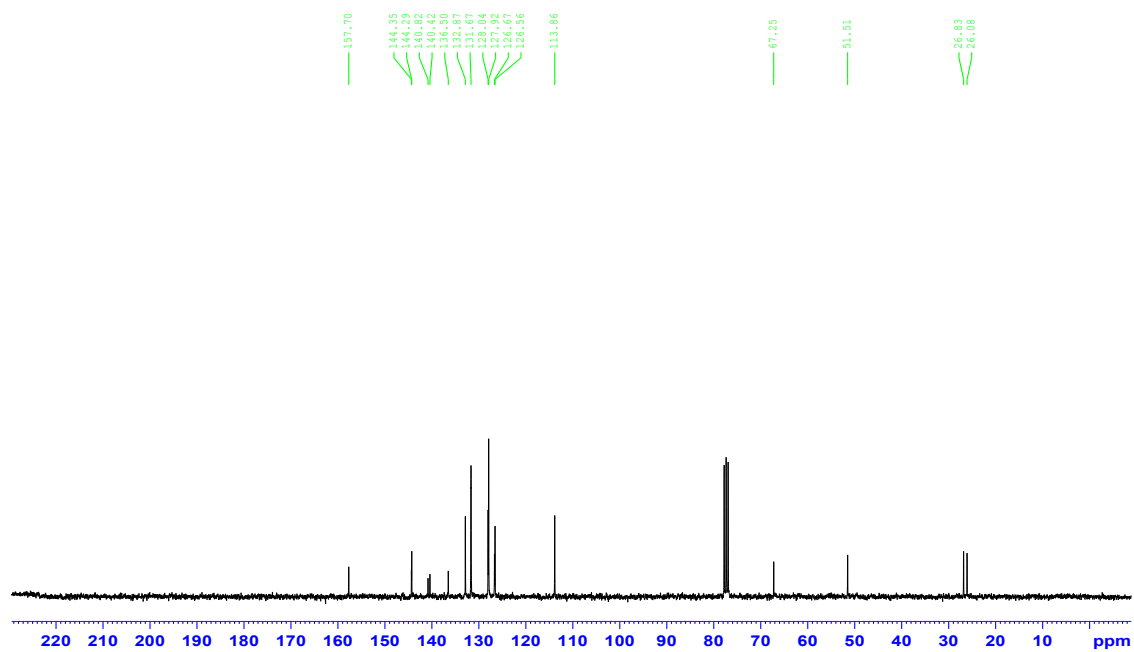

Fig. S27  $^{13}\text{C}$  NMR (75 MHz,  $\text{CD}_3\text{Cl}$ ) spectrum of compound S3.

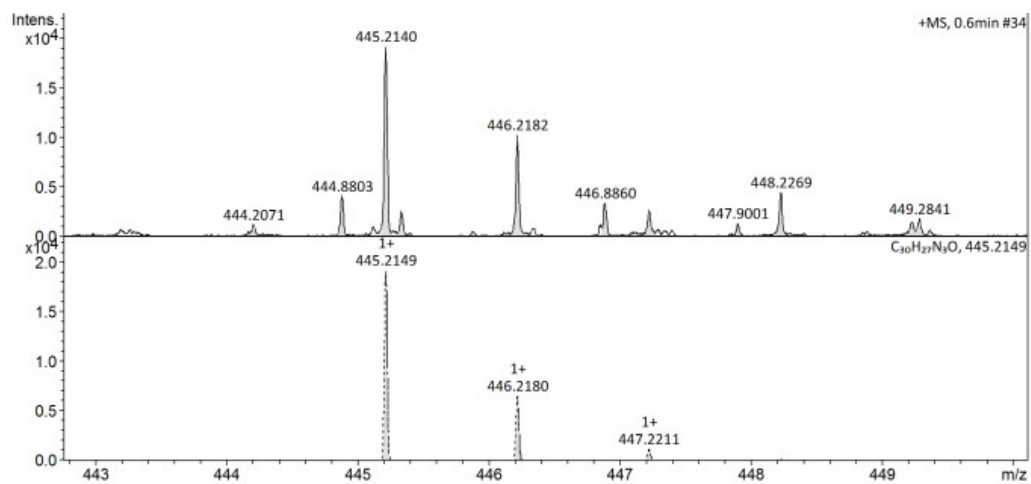

Fig. S28 HRMS ESI (+)-MS spectrum of compound S3.

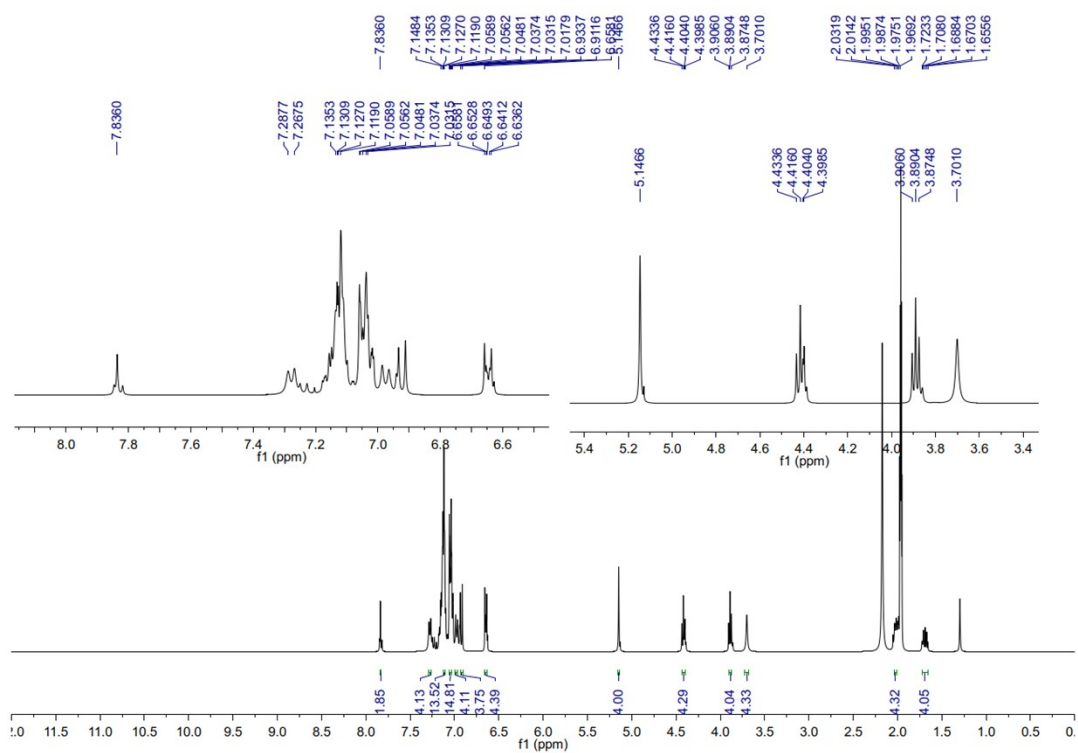

Fig. S29  $^1\text{H}$  NMR (400 MHz,  $\text{CD}_3\text{CN}$ ) spectrum of compound A1.

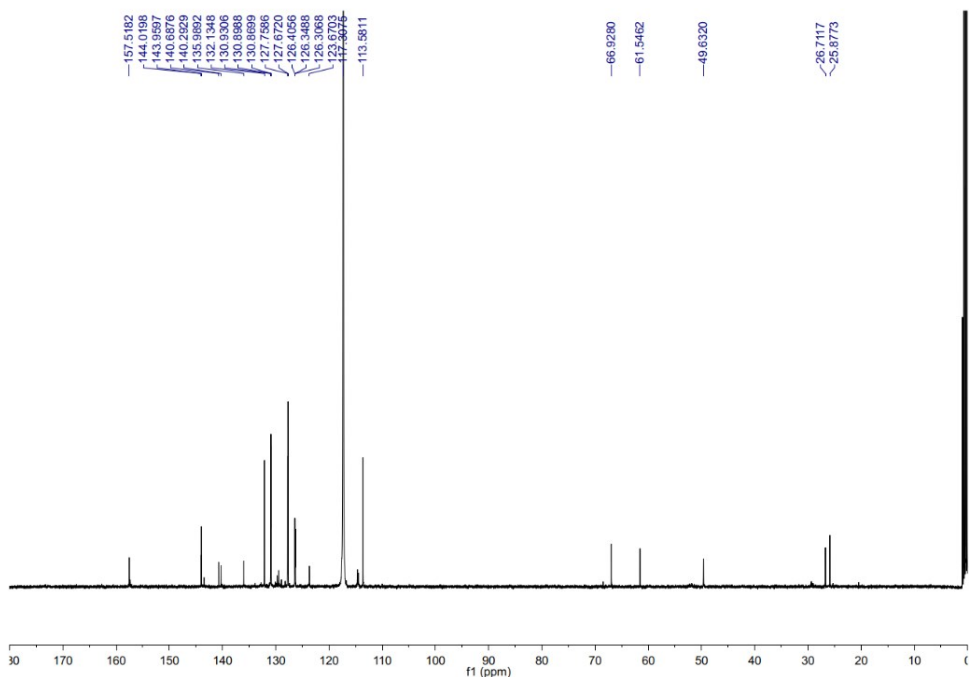

Fig. S30  $^{13}\text{C}$  NMR (100 MHz,  $\text{CD}_3\text{CN}$ ) spectrum of thread A1.

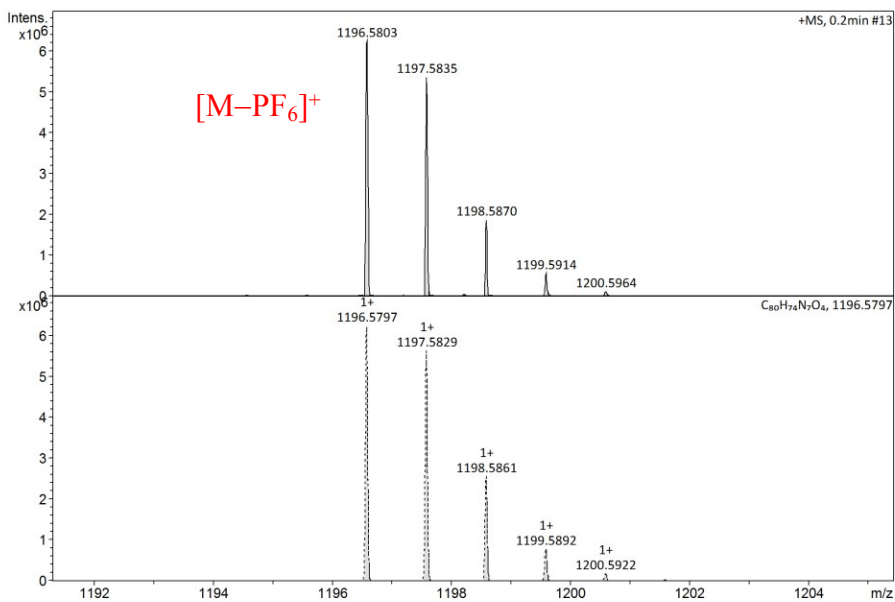

Fig. S31 HRMS ESI (+)-MS spectrum of thread A1.

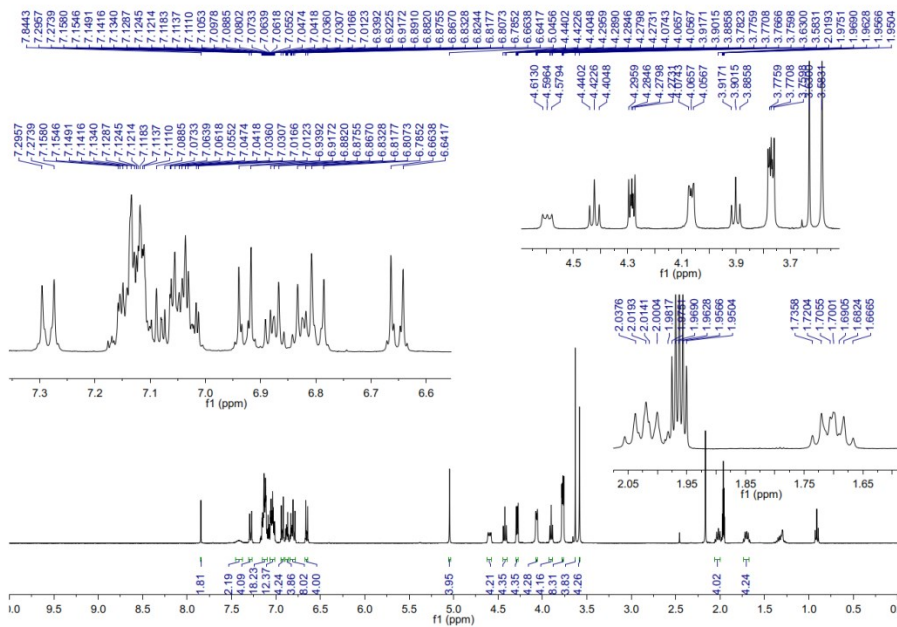

Fig. S32 <sup>1</sup>H NMR (400 MHz, CD<sub>3</sub>CN) spectrum of compound TR1.



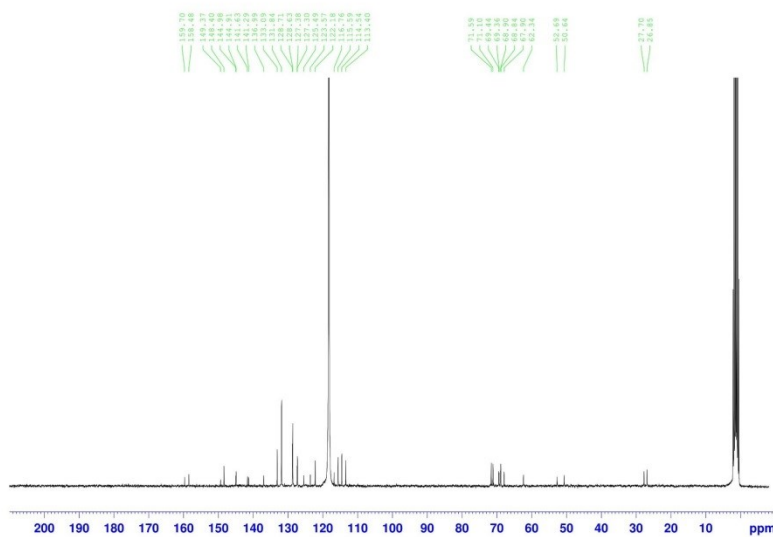

Fig. S33  $^{13}\text{C}$  NMR (75 MHz,  $\text{CD}_3\text{CN}$ ) spectrum of compound TR1.

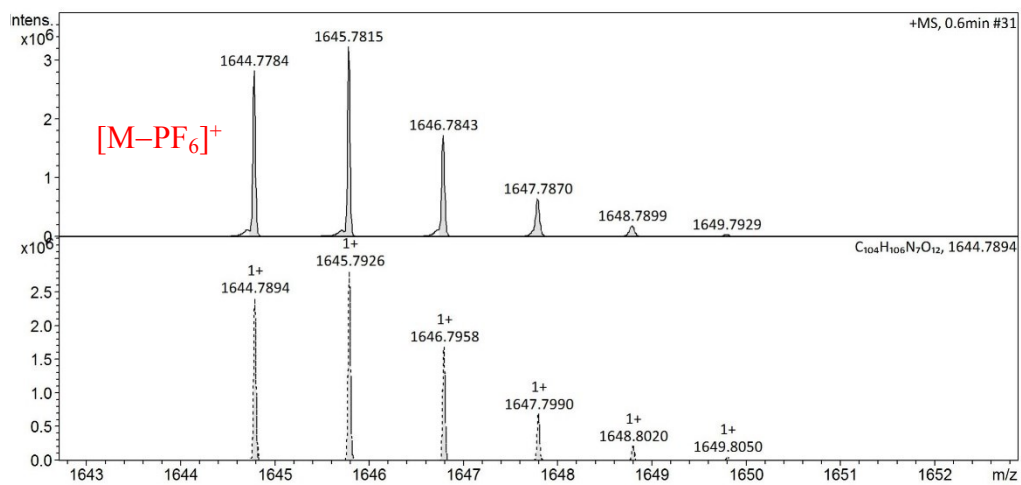

Fig. S34 HRMS ESI (+)-MS spectrum of compound TR1.

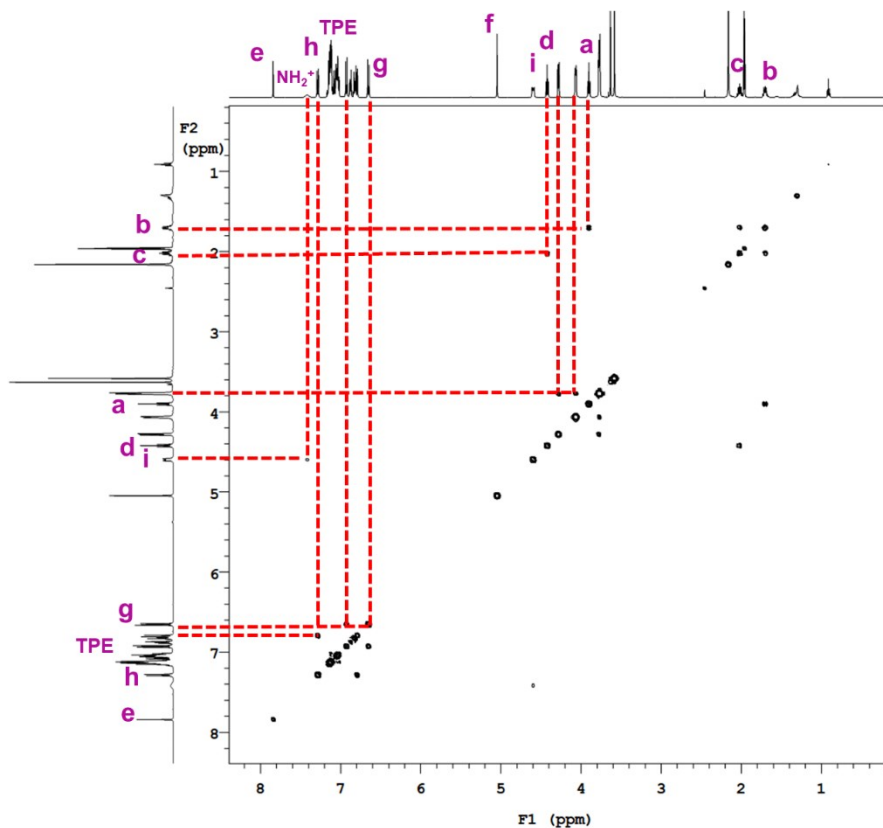

Fig. S35  $^1\text{H}$ - $^1\text{H}$  COSY spectrum (500 MHz, 299.1 K,  $\text{CD}_3\text{CN}$ ) of TR1.

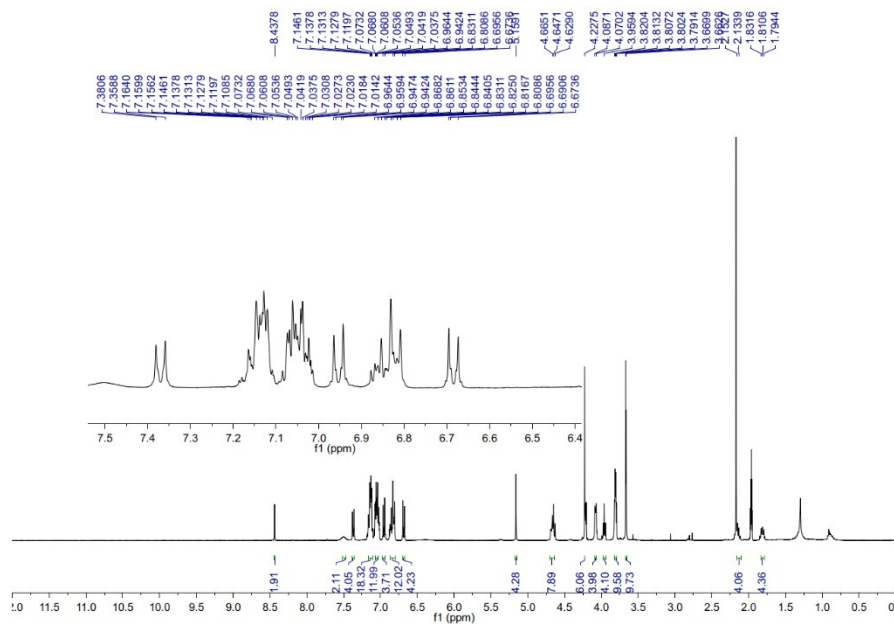

Fig. S36  $^1\text{H}$  NMR (400 MHz,  $\text{CD}_3\text{CN}$ ) spectrum of compound TR2.

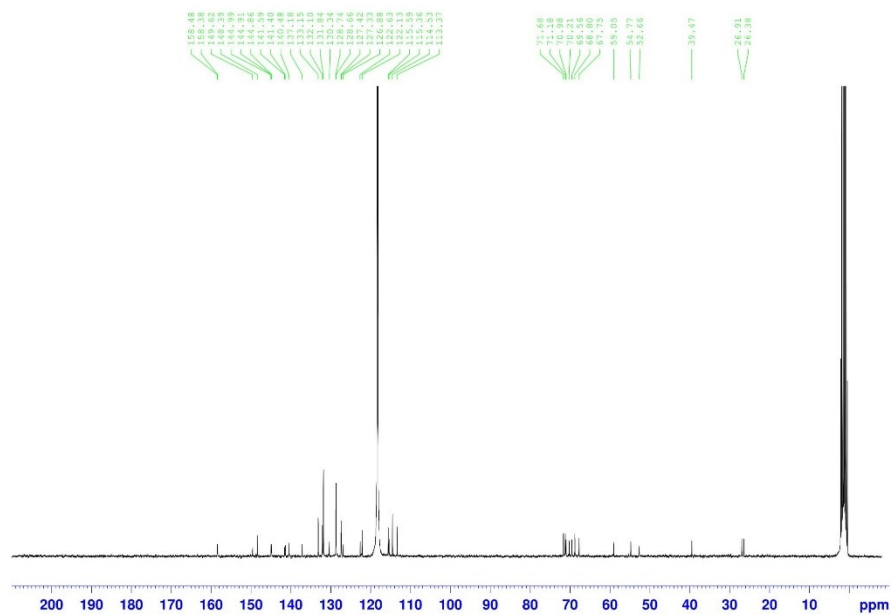

Fig. S37  $^{13}\text{C}$  NMR spectrum of compound TR2.

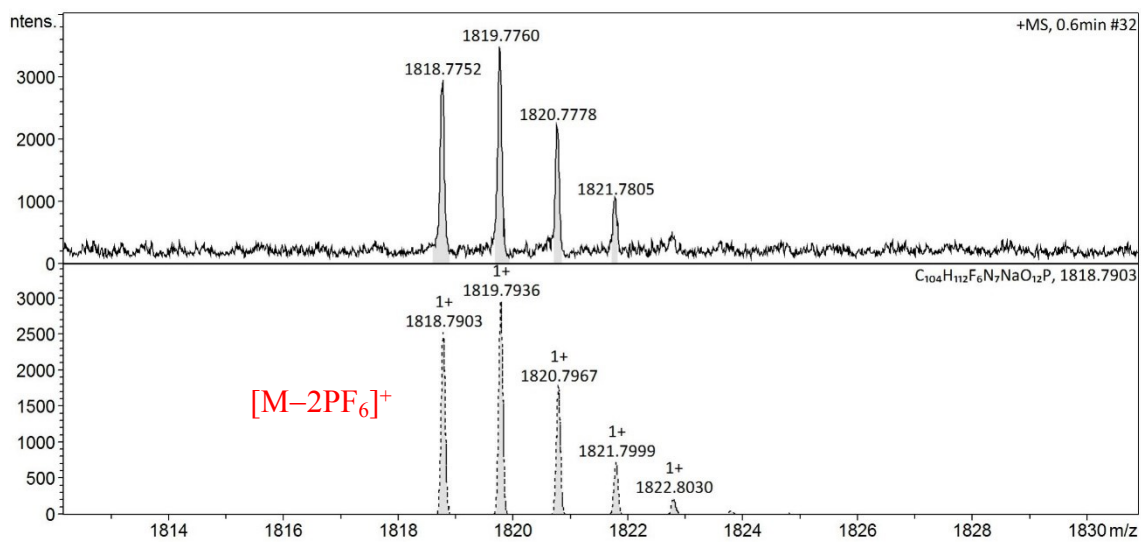

Fig. S38 HRMS ESI (+)-MS spectrum of compound TR2.

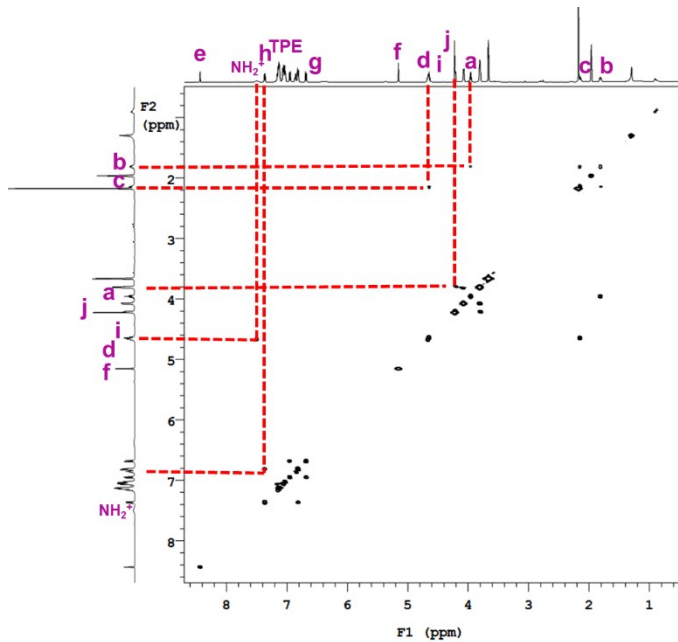

**Fig. S39**  $^1\text{H}$ - $^1\text{H}$  COSY spectrum (500 MHz, 299.1 K,  $\text{CD}_3\text{CN}$ ) of **TR2**.

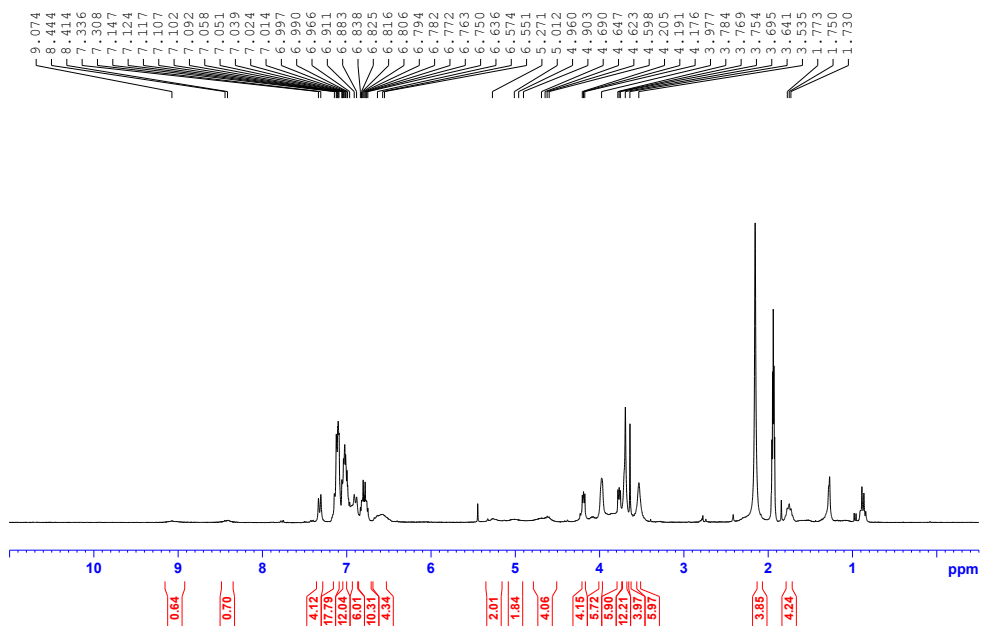

**Fig. S40**  $^1\text{H}$  NMR spectrum of compound **TR3**.

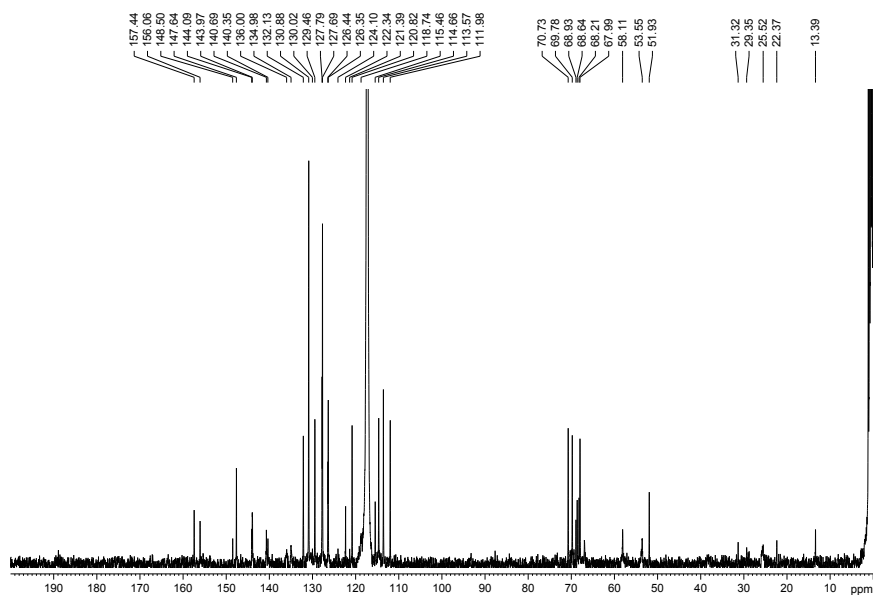

Fig. S42  $^{13}\text{C}$  NMR spectrum of compound TR3.

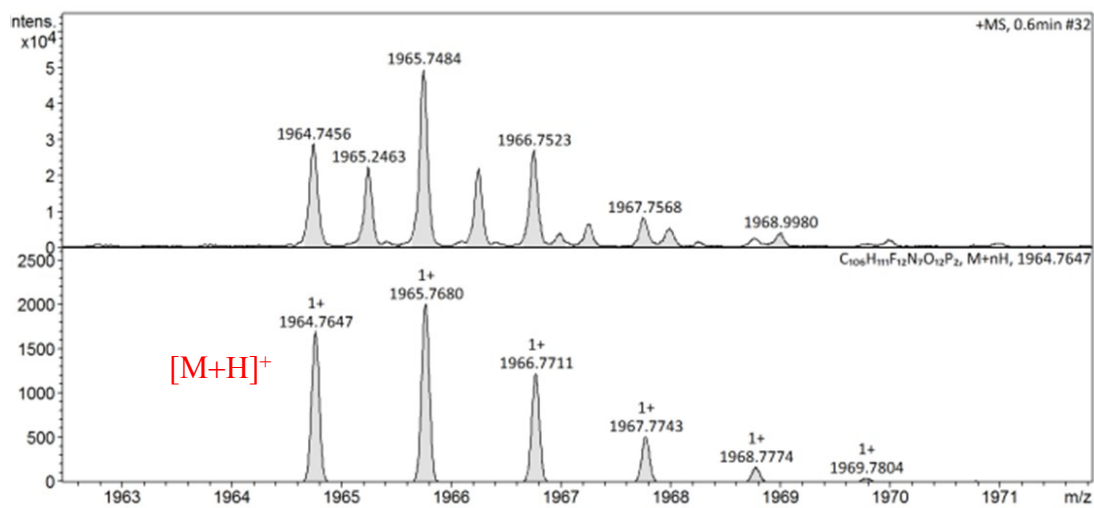

Fig. S42 HRMS ESI (+)-MS spectrum of compound TR3.

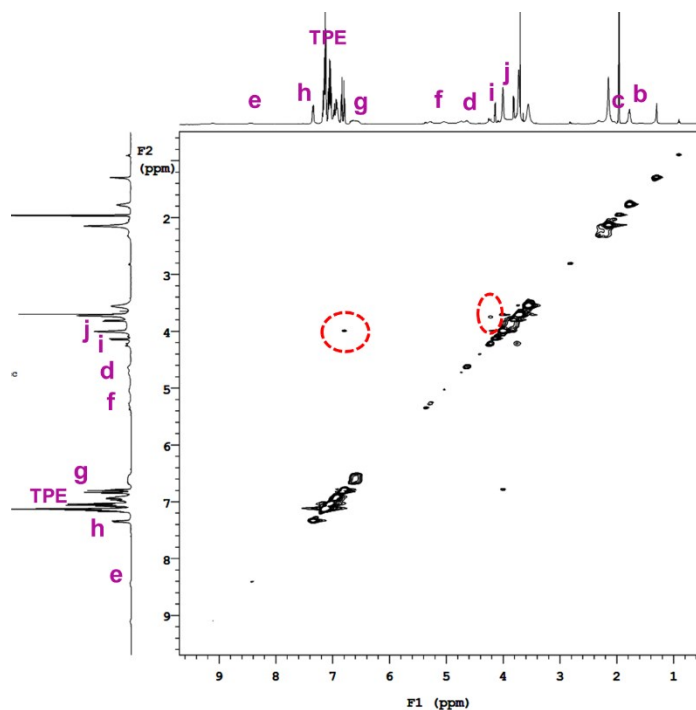

Fig. S43  $^1\text{H}$ - $^1\text{H}$  ROESY spectrum (500 MHz, 300.1 K,  $\text{CD}_3\text{CN}$ ) of TR3.

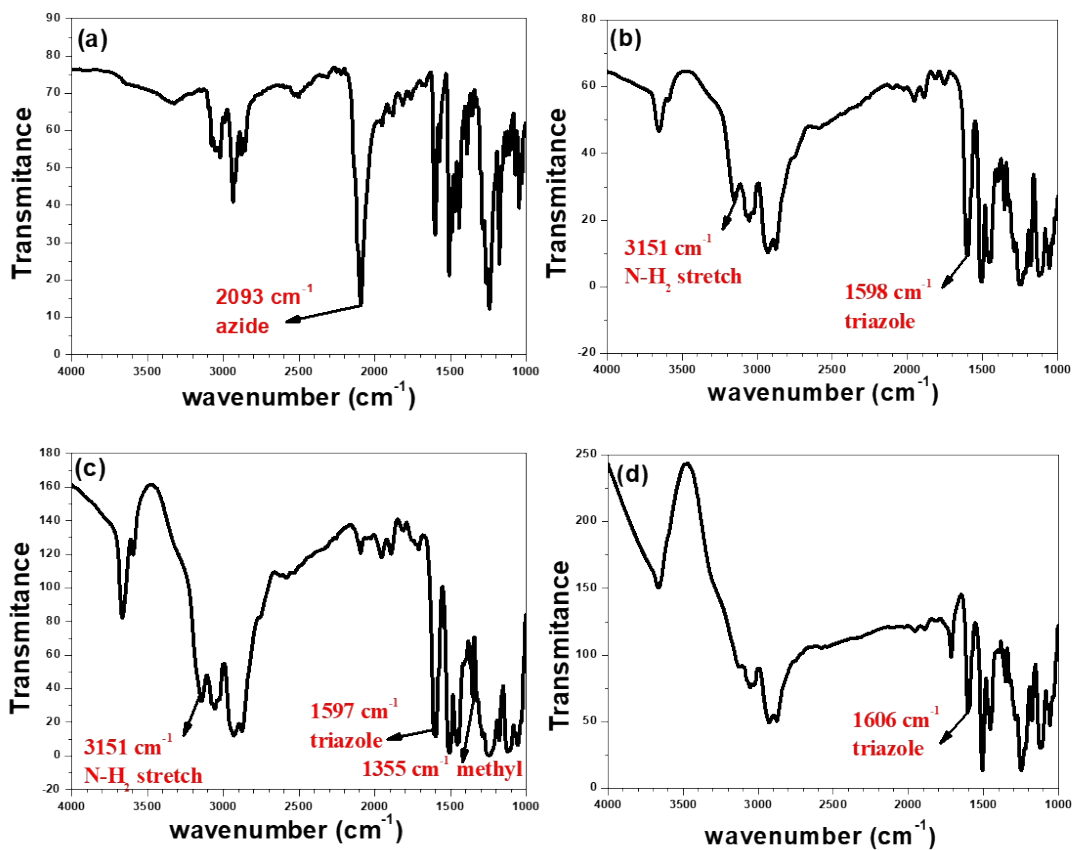

Fig. S44 FT-IR spectra of compounds (a) S3, (b) TR1, (c) TR2 and (d) TR3.

## References

(S1) H. Zhou, J. Li, M. H. Chua, H. Yan, B. Z. Tang, J. Xu, Poly(acrylate) with a tetraphenylethene pendant with aggregation-induced emission (AIE) characteristics: highly stable AIE-active polymer nanoparticles for effective detection of nitro compounds. *Polym. Chem.*, 2014, **5**, 5628–5637.

(S2) Z.-J. Zhang, H.-Y. Zhang, H. Wang, Y. Liu, A twin-axial hetero[7]rotaxane. *Angew. Chem. Int. Ed.*, 2011, **50**, 10834–10838.
